# Supplementary material for: Determining the shunt resistance and photogenerated current of tandem organic solar cells by simulating their practical photovoltaic parameters
Source: Royal Society of Chemistry journal article supplement (doi:10.1039/d5ta06086a), 2025-01-01
Supplement: d5ta06086a1.pdf [file d5ta06086a1.pdf]

## **Supplementary information**

### **Determining the shunt resistance and photogenerated current of tandem organic solar cells via simulating their practical photovoltaic parameters**

Dashan Qin\* and Peipei Zhang

*Hebei Key Laboratory of Functional Polymers, School of Chemical Engineering,  
Hebei University of Technology, Tianjin 300401, People's Republic of China*

## 1 Determining the average bandgap, energetic disorder and effective mobility of the single-junction sub-cells

### 1.1 The acquisition of average bandgap and energetic disorder of active layer

The active layers of the single-junction sub-cells approximate to the black bodies. Thus, the photogenerated current ( $J_{ph}$ ) of each single-junction sub-cell obtained under 1 sun illumination can be estimated by

$$J_{ph} = aq \int_{E_{g,A}}^{\infty} \frac{AM1.5G}{E} dE, \quad (S1)$$

where  $a$  is the absorptance of device,  $q$  is the elementary charge, AM 1.5G represents the spectral irradiance of 1 sun solar light,  $E_{g,A}$  is the average bandgap of active layer,  $E$  is the photon energy. The experimentally measured  $J_{ph}$  is set to the reverse saturation current density of device experimentally measured under 1 sun, because the loss of short-circuit current density ( $J_{SC}$ ) due to shunt resistance ( $R_{SH}$ ) is retrieved at the reverse bias. The  $a$  is taken as the average experimentally measured external quantum efficiency (EQE) from 450 to the wavelength at the half height of the long-wavelength hypotenuse for the EQE spectrum. When the calculated  $J_{ph}$  based on Eq. (S1) is equal to the experimentally measured one under 1 sun illumination, the  $E_{g,A}$  of active layer is concluded.

The open-circuit voltage ( $V_{OC}$ ) of OSC is expressed as

$$V_{OC} = \frac{k_B T}{q} \ln \left( \frac{J_{ph} - \frac{V_{OC}}{R_{SH}}}{J_0} \right), \quad (S2)$$

where  $k_B$  is Boltzmann constant,  $T$  is temperature,  $J_0$  is the background current density due to the bimolecular recombination. Under 1 sun illumination, Eq. (S2) is approximated to

$$V_{OC} \approx \frac{k_B T}{q} \ln \left( \frac{J_{SC}}{J_0} \right). \quad (S3)$$

Provided that the bimolecular recombination is predominant and the bandgap energies meet the Gaussian distribution in active layer, the  $J_0$  is formulated by

$$J_0 = aJ_{00}\exp\left[-\left(\frac{E_{g,A}}{k_B T} + \frac{\sigma^2}{2k_B^2 T^2}\right)\right], \quad (S4)$$

where  $J_{00}$  is expressed as

$$J_{00} = \frac{2\pi q}{h^3 c^2} (k_B T E_{g,A}^2 + 2k_B^2 T^2 E_{g,A} - 2\sigma^2 E_{g,A} + \frac{\sigma^4}{k_B T} + 2k_B^3 T^3 - k_B T \sigma^2), \quad (S5)$$

$\sigma$  is energetic disorder equivalent to the standard deviation of the bandgap energies' Gaussian distribution,  $h$  is Planck constant,  $c$  is the speed of light. Based on the concluded  $E_{g,A}$ , experimentally measured  $J_{SC}$  and  $V_{OC}$  under 1 sun illumination, the  $\sigma$  of active layer is calculated via Eqs. (S3-5).

## 1.2 The calculation of illuminated $J$ - $V$ characteristics

The device current ( $J$ ) under the illumination is calculated by

$$J = J_d + J_{SH} - J_{ph}, \quad (S6)$$

where  $J_d$  is the bimolecular recombination current,  $J_{SH}$  is the leakage current. The  $J_d$  is described by

$$J_d = J_0 \exp\left(\frac{qV_d}{k_B T}\right), \quad (S7)$$

where  $V_d$  is the quasi-Fermi levels' separation in active layer. The  $J_{SH}$  is formulated by

$$J_{SH} = \frac{V_d}{R_{SH}}. \quad (S8)$$

The applied voltage ( $V$ ) of is calculated by

$$V = V_d + V_R, \quad (S9)$$

where  $V_R$  is the voltage drop resulting from the series resistance  $R_S$ . The  $V_R$  is expressed as

$$V_R = JR_S. \quad (S10)$$

The  $R_S$  is formulated as follows [S4,5]

$$R_S = \frac{d}{2q\mu_{eff}\exp\left(\frac{qV_a}{2k_B T}\right)\sqrt{N_H N_L}\exp\left(\frac{-E_{g,A}}{2k_B T} + \frac{\sigma^2}{8k_B^2 T^2}\right)}, \quad (S11)$$

where  $d$  is active layer's thickness,  $\mu_{eff}$  is effective carrier mobility defined as the

square root of the product of hole mobility times electron mobility,  $N_H$  and  $N_L$  are the densities of states for highest occupied molecular orbital for hole hopping and lowest unoccupied molecular orbital for electron hopping in active layer, respectively.

### **1.3 The extractions procedure of $\mu_{\text{eff}}$ and $R_{\text{SH}}$ via modeling the performance of single-junction sub-cell under 1 sun illumination**

Firstly, the  $\mu_{\text{eff}}$  and  $R_{\text{SH}}$  are preset to  $1 \times 10^{-4} \text{ cm}^2 \text{ V}^{-1} \text{ s}^{-1}$  and  $1000 \text{ } \Omega \text{ cm}^2$ , respectively. Secondly, the  $V_d$  is preset from 0 to 2 V at step of 0.001 V. At each preset  $V_d$ , the  $J$  and  $V$  are calculated via Eqs. (S4-11), based on the deduced  $E_{\text{g,A}}$ ,  $\sigma$ , measured  $J_{\text{ph}}$ , preset  $\mu_{\text{eff}}$  and  $R_{\text{SH}}$ . By varying the preset values of  $\mu_{\text{eff}}$  and  $R_{\text{SH}}$ , when the extracted  $J_{\text{SC}}$  and PCE from simulated  $J$ - $V$  curve are identical to those measured for real device, the  $\mu_{\text{eff}}$  and  $R_{\text{SH}}$  are concluded.

*Note that*, the drift–diffusion model is confirmed equivalent to the Shockley equation model in terms of simulating the  $J$ - $V$  characteristics of organic solar cells.<sup>S1,2</sup>

### **References.**

- S1 U. Würfel, D. Neher, A. Spies and S. Albrecht, *Nat. Commun.*, 2015, **6**, 6951.
- S2 A. Fischer, M. Pfalz, K. Vandewal, S. Lenk, M. Liero, A. Glitzky and S. Reineke, *Phys. Rev. Appl.*, 2018, **10**, 014023.
